# Supplementary material for: Traditional Knowledge and Modern Motivations for Consuming Seaweed (Limu) in Samoa
Source: MDPI journal article supplement (doi:10.3390/su14106212), 2022-05-20
Supplement: s1 [file s1]

Archive with 1 entries (1 files):
- sustainability-1698263-supplementary.pdf
